# Supplementary material
Source: PubMed Central journal article supplement (PMC3752283)
Supplement: NIHMS498281-supplement-ESI.pdf [file NIHMS498281-supplement-ESI.pdf]

# Supporting Information

## **$\beta$ -Turn Sequences Promote Stability of Peptide Substrates for Kinases within the Cytosolic Environment**

Shan Yang,<sup>1</sup> Angela Proctor,<sup>1</sup> Lauren L. Cline,<sup>1</sup> Kaiulani M. Houston,<sup>1</sup>  
Marcey L. Waters,<sup>1</sup> and Nancy L. Allbritton<sup>1,2</sup>

<sup>1</sup>Department of Chemistry, University of North Carolina, Chapel Hill, NC  
27599

<sup>2</sup>Department of Biomedical Engineering, University of North Carolina,  
Chapel Hill, NC 27599 and North Carolina State University, Raleigh, NC  
27695

# Table of Contents

|                                    |            |
|------------------------------------|------------|
| <b>Supplementary Figures .....</b> | <b>S-3</b> |
| Figure S-1.....                    | S-3        |
| Figure S-2.....                    | S-4        |
| Figure S-3.....                    | S-5        |
| Figure S-4.....                    | S-6        |
| Figure S-5.....                    | S-7        |
| Figure S-6.....                    | S-8        |
| Figure S-7.....                    | S-9        |
| Figure S-8.....                    | S-10       |
| Table S-1 .....                    | S-11       |

## Supplementary Figures

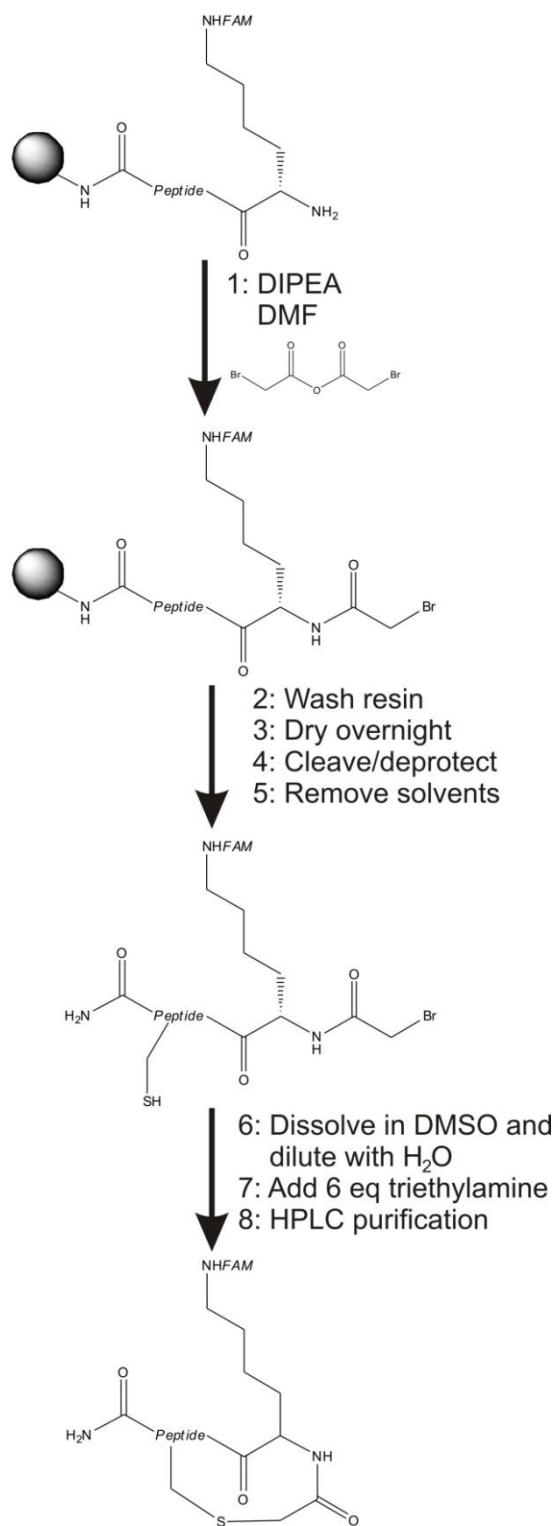

Figure S1: Scheme of bromoacetylation for crosslinking peptides **4** and **5**.

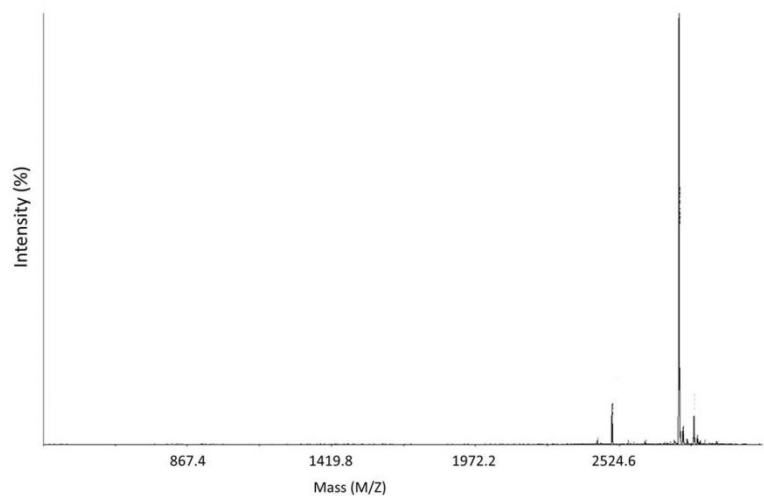

Figure S2: MALDI-MS of peptide **2**.

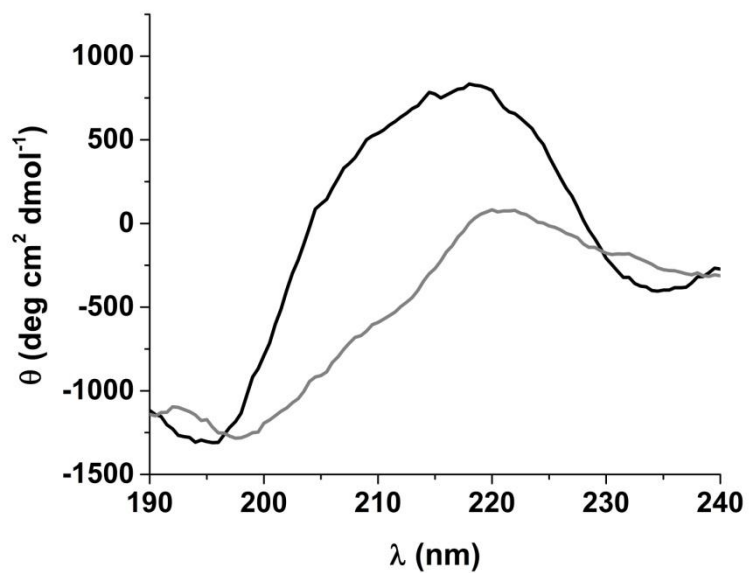

Figure S3: Circular dichroism spectra of peptides **2** (black) and **3** (gray) at a peptide concentration of 20  $\mu\text{M}$  in deionized water (pH 7.38) at 25  $^{\circ}\text{C}$ .

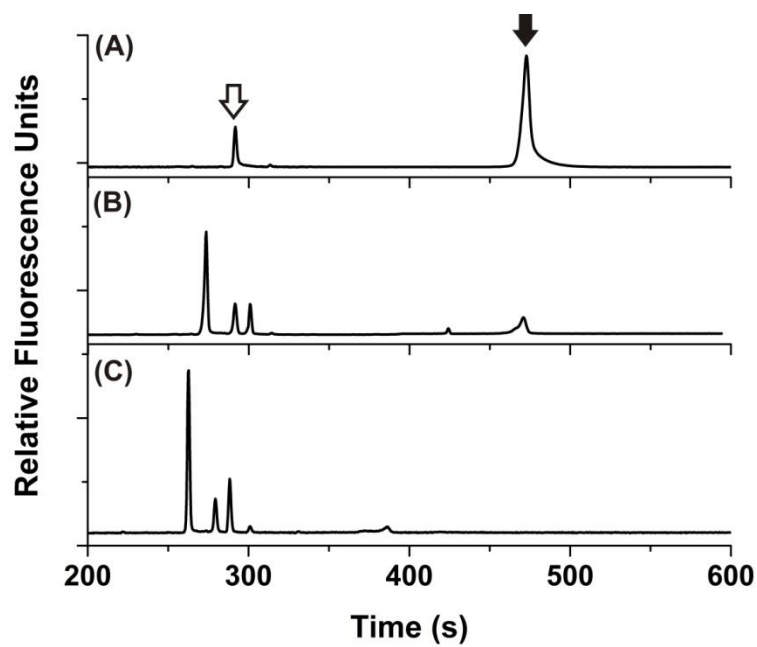

Figure S4: Electropherograms of peptide **1** after incubation in a Baf/BCR-ABL cytosolic lysate for 0 (A), 3 (B), or 5 (C) min. The open arrow indicates an internal standard and the solid arrow indicates intact peptide **1**.

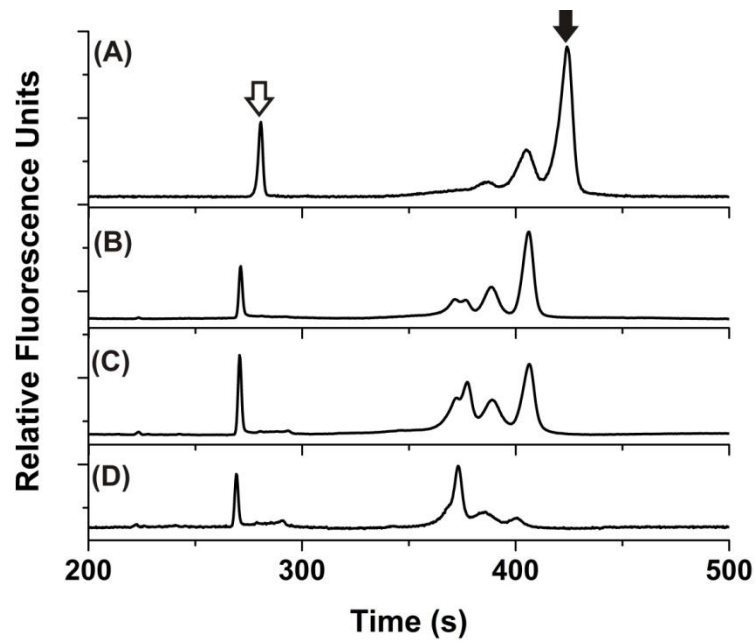

Figure S5: Electropherograms of peptide **5** after incubation in a Baf/BCR-ABL cytosolic lysate for 0 (A), 15 (B), 20 (C), or 40 (D) min. The open arrow indicates an internal standard and the solid arrow indicates intact peptide **5**.

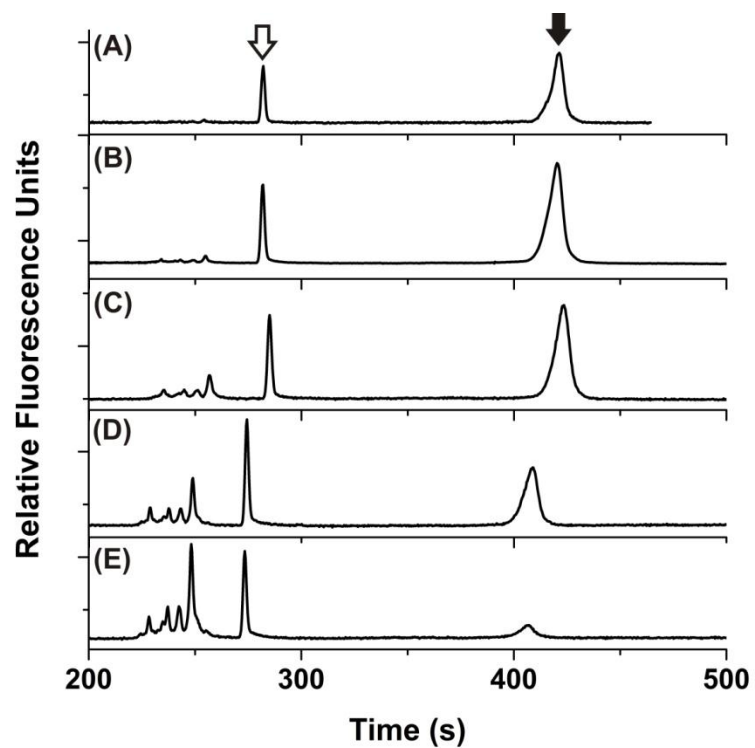

Figure S6: Electropherograms of peptide **6-FlAsH** after incubation in a Baf/BCR-ABL cytosolic lysate for 0 (A), 5 (B), 20 (C), 30 (D), or 50 (E) min. The open arrow indicates an internal standard and the solid arrow indicates intact peptide **6-FlAsH**.



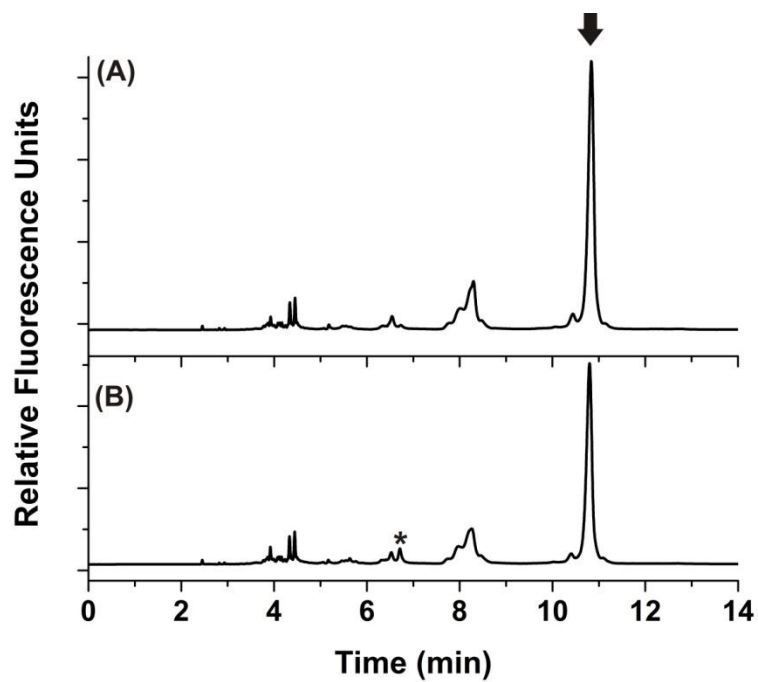

Figure S7: Electropherograms of peptide **5** after a 10 min incubation with ATP in a Baf/BCR-ABL cytosolic lysate with (A) and without (B) the inhibitor Gleevec. The solid arrow indicates intact peptide **5** and the asterisk represents phosphorylated peptide **5**.

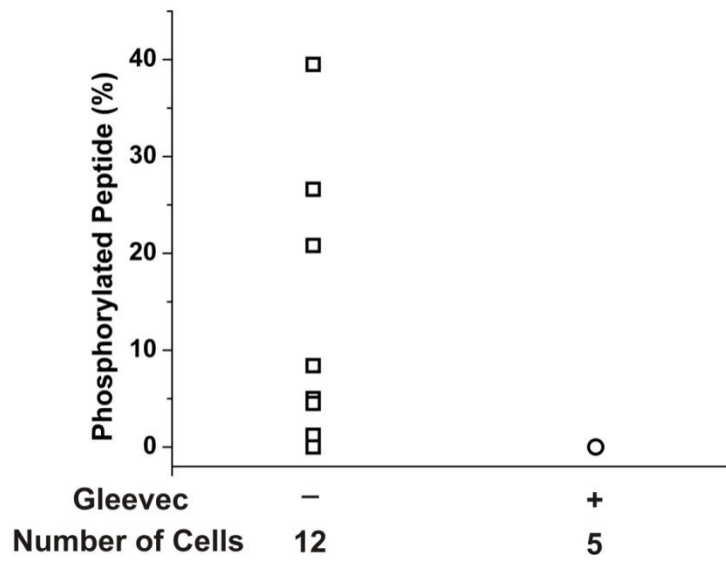

Figure S8: Percent phosphorylation of peptide **5** in single Baf/BCR-ABL cells with (open circles) and without (open squares) pre-treatment with Gleevec. Percent phosphorylated peptide is calculated for undegraded peptide only.

| <b>Peptide</b> | <b>Calculated MW (Da)</b> | <b>Measured MW (Da)</b> |
|----------------|---------------------------|-------------------------|
| <b>1</b>       | 1691.5                    | 1692.3                  |
| <b>2</b>       | 2723.3                    | 2723.4                  |
| <b>3</b>       | 2981.5                    | 2981.4                  |
| <b>4</b>       | 2866.4                    | 2867.3                  |
| <b>5</b>       | 3123.5                    | 3124.2                  |

Table S1: The calculated and MALDI-MS detected molecular weights (MW) for the peptides.
